# Supplementary material for: Microbial basis of Fusarium wilt suppression by Allium cultivation
Source: PubMed Central journal article supplement (PMC6368641; doi:10.1038/s41598-018-37559-7), 2019-02-08
Supplement: 41598_2018_37559_MOESM1_ESM.pdf [file 41598_2018_37559_MOESM1_ESM.pdf]

1 **Microbial basis of Fusarium wilt suppression by *Allium* cultivation**

2

3 **Tomoki Nishioka<sup>1</sup>, Malek Marian<sup>1</sup>, Issei Kobayashi<sup>2</sup>, Yuhko Kobayashi<sup>2</sup>, Kyosuke**  
4 **Yamamoto<sup>3</sup>, Hideyuki Tamaki<sup>3</sup>, Haruhisa Suga<sup>4</sup>, Masafumi Shimizu<sup>1,\*</sup>**

5

6 <sup>1</sup>*The United Graduate school of Agricultural Science, Gifu University, Gifu, Japan*

7 <sup>2</sup>*Center for Molecular Biology and Genetics, Mie University, Tsu, Mie, Japan*

8 <sup>3</sup>*Bioproduction Research Institute, National Institute of Advanced and Industrial Science and*  
9 *Technology (AIST), Tsukuba, Japan*

10 <sup>4</sup>*Life Science Research Center, Gifu University, Gifu, Japan*

11

12 \* Corresponding author (M. Shimizu)

13 E-mail address: [shimizma@gifu-u.ac.jp](mailto:shimizma@gifu-u.ac.jp)

14 Postal address: The United Graduate school of Agricultural Science, Gifu University, 1-1

15 Yanagido, Gifu City 5011193, Japan

## 16 **Supplementary Materials and methods**

### 17 **Preparation of pathogen inoculum**

18 *Fusarium oxysporum* f. sp. *cucumerinum* (Focu) isolate GUS77 used in this study as the  
19 challenging pathogen was previously recovered from cucumber fields and was chosen based on  
20 its performance on aggressiveness tests. FocuGFP-10, a green fluorescent protein (GFP)-tagged  
21 isolate of GUS77, was used for fluorescent microscopy and confocal laser scanning microscopy.  
22 The isolates were pre-cultured in potato sucrose agar (infused potato, 200 g; sucrose, 20 g; agar,  
23 15 g, per 1 liter of distilled water) for 4 days at 25°C before use. Each spore suspension was  
24 prepared by inoculating 50 ml of potato sucrose broth (infused potato, 200 g; sucrose, 20 g, per 1  
25 liter of distilled water) with mycelial plugs (8 mm in diameter) obtained from the colony on potato  
26 sucrose agar. The inoculated flask was then shaken at 120 rpm for 4 days at 25°C. Thereafter, the  
27 culture broth was filtered through three layers of sterile gauze to separate filamentous mycelia  
28 from the spores, and the latter was collected by centrifugation of the filtrate at 3,000 rpm for 10  
29 min. These precipitated spores were then resuspended in sterile distilled water (SDW), and the  
30 concentration of the suspension was adjusted using a haemocytometer.

### 31 **Preparation of soils cultivated with *Allium* and cucumber plants**

32 In order to confirm whether *Allium* cultivation induces soil suppressiveness against pathogenic *F.*  
33 *oxysporum*, we evaluated soils cultivated with *Allium* plants or cucumber and a non-cultivated  
34 soil. For this, we prepared soils cultivated with Welsh onion, onion, and cucumber (*Cucumis*  
35 *sativus*) as follows. Ninety-day-old seedlings of Welsh onion (cv. Kujohoso), 40-day-old  
36 seedlings of onion (cv. Syarumu), and 20-day-old seedlings of cucumber (cv. Tokiwa jibai) were  
37 used for transplanting. Each *Allium* plant (three seedlings per pot) or cucumber (one seedling per  
38 pot) was transplanted into a vinyl pot (15-cm in diameter, 8-cm deep) filled with soil collected  
39 from a field on the experimental farm of Gifu University. The plants were then grown for 70 days  
40 in a greenhouse at 20–25°C under natural light with regular watering. After 70 days, the plants  
41 were uprooted from the pots and the remaining soil was collected and then sieved through a 2-  
42 mm mesh sieve (designated as “cultivated soil”). Additionally, soil maintained under the same  
43 conditions without plant cultivation was also prepared (designated as “non-cultivated soil”).  
44 These soils were used in the following experiments.

### 45 **Preparation of root extracts from Welsh onion and cucumber**

46 For preparation of root extracts, Welsh onion and cucumber seedlings were grown in vinyl pots  
47 containing field soil for 70 days as described above. These plants were uprooted from the pots  
48 and the adhering soil was carefully removed from the roots, and then washed with running tap  
49 water. The roots were cut off and drained on paper towels. The fresh root weight of each plant  
50 and wet weight of the soil remaining in each pot were recorded to determine the fresh root weight  
51 (mg) per wet weight (g) of soil. The mean of three replicates was found to be 8.3 and 6.3 mg of

52 roots (Welsh onion and cucumber, respectively) per g of wet soil. The roots were homogenized  
53 in liquid nitrogen using a mortar and pestle, and the homogenate was immediately transferred to  
54 a 50-ml tube. To extract aqueous compounds, 30 ml of SDW was added to the tube containing  
55 the homogenate and mixed thoroughly with a vortex mixer for 1 min. Thereafter, the homogenate  
56 suspension was filtered using filter paper (Advantec Toyo No. 1, Toyo Roshi, Tokyo, Japan) and  
57 a micro filter (Millex GV, pore size 0.22  $\mu$ l, Merck Millipore, Carrigtwohill, Ireland) to remove  
58 plant debris and microorganisms. The resulting filtrate was diluted with SDW to a concentration  
59 of 50 mg root  $\text{ml}^{-1}$  and used as root extract. The root extracts were stored at  $-20^{\circ}\text{C}$  until use.

#### 60 **Impact of heat treatment on culturable bacterial and fungal populations in *Allium*-** 61 **cultivated soils**

62 In parallel with the assessment of an effect of heat treatment on soil suppressiveness, we  
63 investigated possible changes in the bacterial and fungal populations in *Allium*-cultivated soil.  
64 For this, 10 g aliquots of either Welsh onion- or onion-cultivated soil, prepared as described above,  
65 were suspended in 90 ml of SDW in a 200-ml Erlenmeyer flask and shaken for 15 min on a rotary  
66 shaker at 150 rpm. After shaking, each soil suspension was heat-treated as described above. The  
67 population densities of bacteria and fungi were enumerated using the dilution plating method with  
68 1/10 strength tryptic soy agar (TSA; Difco Laboratories, MI, USA) and rose bengal-streptomycin  
69 agar<sup>37</sup>, respectively. Eleven to 20 bacterial colonies on the plates that yielded 11–100 bacterial  
70 colonies on 1/10-strength TSA were picked and purified using quadrant streaking. The Gram  
71 reactions of the bacterial isolates were determined using the non-staining (KOH) method<sup>38</sup>. The  
72 experiment was repeated three times.

#### 73 **Suppressive effect of *Flavobacterium* isolates on cucumber *Fusarium* wilt**

74 *Flavobacterium* isolates obtained from *Allium* rhizospheres were evaluated for their ability to  
75 suppress cucumber *Fusarium* wilt in the cucumber seedling assay. For comparison, suppressive  
76 effect of *Chryseobacterium* isolates obtained from Welsh onion were also tested (designated as  
77 “bacterized control”). Each isolate of *Flavobacterium* (n = 19) and *Chryseobacterium* (n = 15) was  
78 cultured in Reasoner’s 2A broth at  $25^{\circ}\text{C}$  with shaking at 200 rpm for 24 h. Protocol of cucumber  
79 seedling assay was same as that used for the evaluation of suppressive effect of the root extract  
80 of Welsh onion. Instead of the root extract, a 1-ml aliquot of each bacterial culture (ca.  $0.5\text{--}1.0 \times$   
81  $10^9$  cells  $\text{ml}^{-1}$ ) was applied to the Focu-inoculated soil mixture in flat-bottom glass tubes. As a  
82 non-bacterized control, the same volume of SDW was added. After planting cucumber seeds, the  
83 tubes were incubated in a controlled environmental chamber ( $25^{\circ}\text{C}$ , 12 h of daylight) for 14 days.  
84 The disease severity in the cucumber seedlings was assessed using the same rating scale described  
85 above, and the results were expressed as a relative disease index (RDI; %), calculated using the  
86 following formula:  $\text{RDI} = (\text{mean disease scale in the bacterized treatment} / \text{mean disease scale in}$   
87  $\text{non-bacterized control treatment}) \times 100$ . There were three tubes per treatment and the experiment

88 was repeated three times.

### 89 **Statistical analyses**

90 Statistical analyses were performed using BellCurve for Excel (version 2.13) (Social Survey  
91 Research Information, Tokyo, Japan). The means of disease index were compared using ANOVA  
92 followed by Tukey's test at  $P < 0.01$ . The data of population density of FocuGFP-10/Focu were  
93 transformed into base 10 logarithms and then compared using ANOVA followed by Tukey's test  
94 at  $P < 0.01$ . Relative abundances of genera in each rhizosphere soil and non-cultivated soil were  
95 compared using ANOVA followed by Tukey's test at  $P < 0.05$ . The RDI in the bacterized soils  
96 were compared using Mann–Whitney U-test at  $P < 0.01$ . Means total length of FocuGFP-10  
97 hyphae in bacterized soils were compared using ANOVA followed by Tukey's test at  $P < 0.01$ .

98

99

### 100 **References for supplementary materials and methods**

- 101 37. Martin, J. P. Use of acid, rose bengal, and streptomycin in the plate method for  
102 estimating soil fungi. *Soil Sci.* **69**, 215–232 (1950).
- 103 38. Gregersen, T. Rapid method for distinction of gram-negative from gram-positive  
104 bacteria. *Eur. J. Appl. Microbiol. Biotechnol.* **5**, 123–127 (1978).

105

106

107

108

109 **Supplementary Table S1** Sequencing results and alpha-diversity

| Soil sample         | Number of raw reads | Number of reads processed by DADA2 | Number of OTU | Number of genus | Shannon index  |
|---------------------|---------------------|------------------------------------|---------------|-----------------|----------------|
| Welsh onion         | 127248 ± 5780       | 21378 ± 1474                       | 552 ± 42      | 80 ± 5          | 5.87 ± 0.06 ab |
| Onion               | 124055 ± 16139      | 17924 ± 2071                       | 475 ± 31      | 74 ± 8          | 5.66 ± 0.04 a  |
| Cucumber            | 107147 ± 25224      | 15597 ± 4516                       | 391 ± 116     | 75 ± 17         | 5.45 ± 0.25 a  |
| Non-cultivated soil | 130404 ± 19476      | 25645 ± 4397                       | 705 ± 125     | 83 ± 6          | 6.24 ± 0.20 b  |

110 Data are presented as mean ± SD (n = 3). The values followed by different letters within a row  
 111 were significantly different according to Tukey's test (P < 0.05)

112

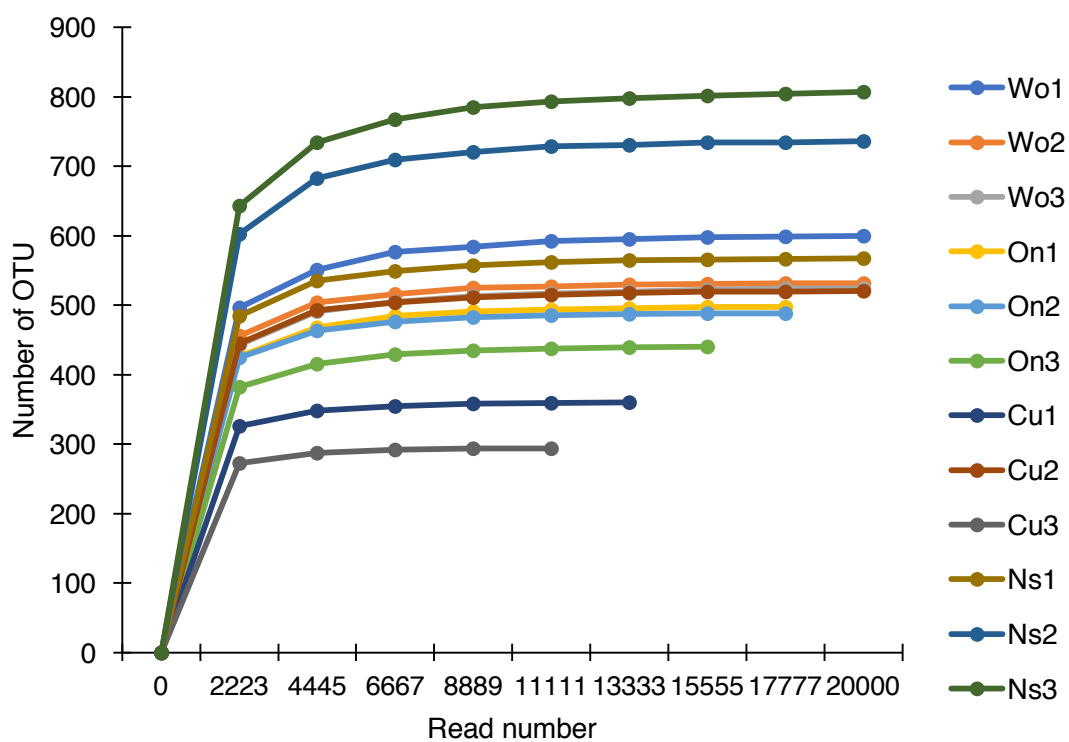

114

115 **Supplementary Figure S1** Rarefaction curves for microbe operational taxonomic units (OTUs)  
 116 from each soil sample. Wo: Welsh onion rhizosphere soil, On: onion rhizosphere soil, Cu:  
 117 cucumber rhizosphere soil, and Ns: non-cultivated soil

118

119

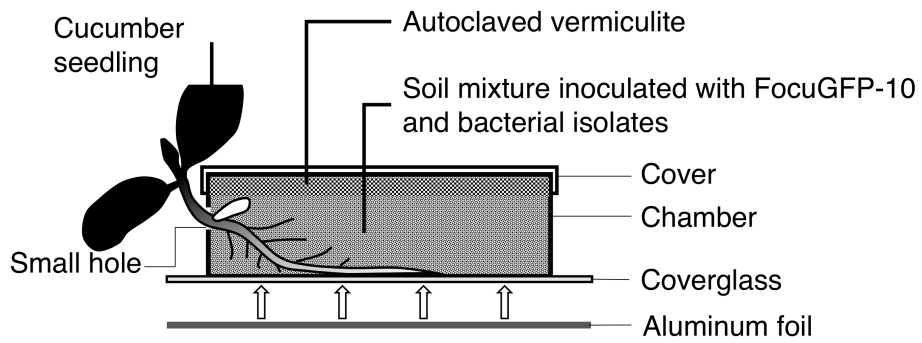

120

121 **Supplementary Figure S2** Experimental set up used to test inhibitory effect of *Flavobacterium*

122 isolates on hyphal growth of FocuGFP-10 in soil
